# Supplementary material for: Chicken fillets subjected to UV‐C and pulsed UV light: Reduction of pathogenic and spoilage bacteria, and changes in sensory quality
Source: PubMed Central journal article supplement (PMC6084340; doi:10.1111/jfs.12421), 2017-11-23
Supplement: JFS-38-na-s001.pdf [file JFS-38-na-s001.pdf]

## 952 SUPPORTING INFORMATION

953

954 **TABLE S1** Bacterial reductions log CFU/cm<sup>2</sup> on chicken fillet meat after continuous UV-C  
 955 and pulsed UV light treatments at different fluences (J/cm<sup>2</sup>)

956

| Bacterial species                    | Continuous UV-C light treatment <sup>a</sup> , J/cm <sup>2</sup> |                |                |                |                | Pulsed UV light treatment <sup>a</sup> , J/cm <sup>2</sup> |                |                |                |
|--------------------------------------|------------------------------------------------------------------|----------------|----------------|----------------|----------------|------------------------------------------------------------|----------------|----------------|----------------|
|                                      | 0.05                                                             | 0.1            | 0.3            | 0.6            | 3.0            | 1.25                                                       | 3.6            | 10.8           | 18.0           |
| <i>S. Enteritidis</i>                | 1.56<br>(0.15)                                                   | 1.21<br>(0.13) | 1.81<br>(0.16) | 1.53<br>(0.23) | 2.44<br>(0.17) | 0.90<br>(0.05)                                             | 1.58<br>(0.09) | 2.44<br>(0.20) | 2.23<br>(0.19) |
| <i>L. monocytogenes</i>              | 1.49<br>(0.13)                                                   | 1.13<br>(0.14) | 1.82<br>(0.22) | 1.36<br>(0.16) | 1.81<br>(0.27) | 1.08<br>(0.12)                                             | 1.83<br>(0.13) | 2.01<br>(0.25) | 1.63<br>(0.21) |
| <i>S. aureus</i>                     | 2.22<br>(0.18)                                                   | 2.23<br>(0.22) | 2.56<br>(0.20) | 2.05<br>(0.26) | 2.41<br>(0.16) | 1.25<br>(0.09)                                             | 2.21<br>(0.16) | 2.95<br>(0.33) | 2.61<br>(0.25) |
| <i>E. coli</i> EHEC                  | 1.08<br>(0.18)                                                   | 1.34<br>(0.19) | 1.10<br>(0.12) | 1.30<br>(0.18) | 1.65<br>(0.17) | 1.06<br>(0.11)                                             | 1.96<br>(0.22) | 1.98<br>(0.29) | 2.93<br>(0.21) |
| <i>Pseudomonas</i> spp.              | 2.01<br>(0.10)                                                   | 1.85<br>(0.20) | 1.95<br>(0.15) | 2.23<br>(0.21) | 2.66<br>(0.24) | 1.67<br>(0.06)                                             | 2.25<br>(0.18) | 2.45<br>(0.18) | 3.01<br>(0.14) |
| <i>B. thermospacta</i>               | 1.70<br>(0.17)                                                   | 1.74<br>(0.24) | 2.41<br>(0.22) | 2.33<br>(0.32) | 2.68<br>(0.37) | 1.30<br>(0.13)                                             | 2.28<br>(0.20) | 3.00<br>(0.37) | 2.88<br>(0.30) |
| <i>C. divergens</i>                  | 1.90<br>(0.16)                                                   | 1.95<br>(0.25) | 2.32<br>(0.14) | 2.04<br>(0.14) | 2.82<br>(0.14) | 1.46<br>(0.17)                                             | 1.59<br>(0.17) | 1.84<br>(0.21) | 1.61<br>(0.35) |
| <i>E. coli</i> ESBL                  | 1.65<br>(0.11)                                                   | 1.91<br>(0.11) | 2.43<br>(0.20) | 2.79<br>(0.15) | 2.56<br>(0.22) | 1.34<br>(0.09)                                             | 2.17<br>(0.17) | 2.58<br>(0.17) | 2.83<br>(0.25) |
| <i>C. divergens</i> MAP <sup>b</sup> | 1.26<br>(0.15)                                                   | 1.30<br>(0.11) | 1.52<br>(0.21) | 1.80<br>(0.24) | 1.38<br>(0.14) | 0.54<br>(0.21)                                             | 0.90<br>(0.22) | 1.35<br>(0.29) | 1.53<br>(0.08) |
| <i>E. coli</i> ESBL MAP <sup>b</sup> | 1.46<br>(0.11)                                                   | 1.69<br>(0.22) | 2.12<br>(0.27) | 2.49<br>(0.25) | 2.33<br>(0.18) | 0.61<br>(0.14)                                             | 1.09<br>(0.12) | 1.70<br>(0.18) | 1.56<br>(0.16) |

<sup>a</sup>Standard error values are shown in brackets

<sup>b</sup>MAP refers to modified atmosphere packaging
